# Supplementary material for: 3-Carboxy-4-methyl-5-propyl-2-furanpropanoic acid (CMPF) induces cell death through ferroptosis and acts as a trigger of apoptosis in kidney cells
Source: Springer Nature journal article supplement (doi:10.1038/s41419-023-05601-w), 2023-02-02
Supplement: MOESM1 [file 41419_2023_5601_MOESM1_ESM.pdf]

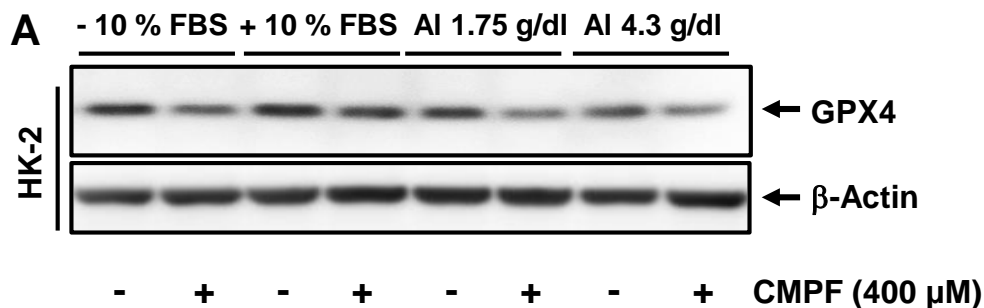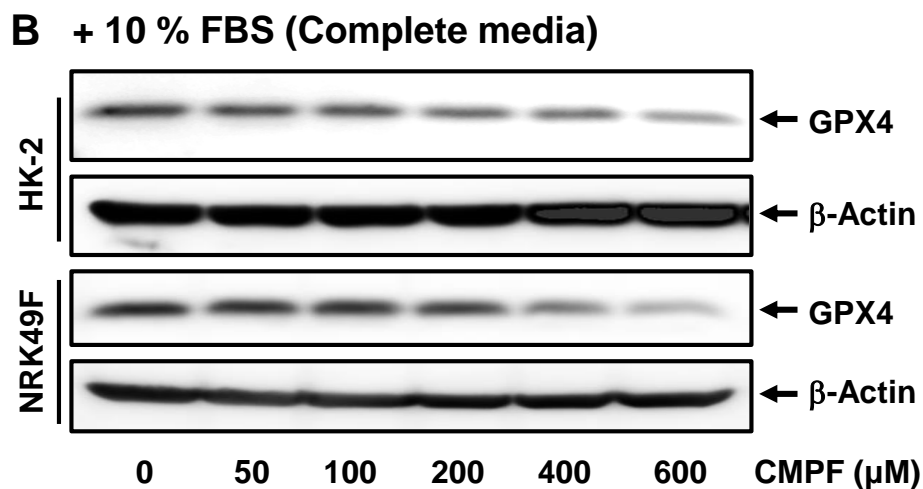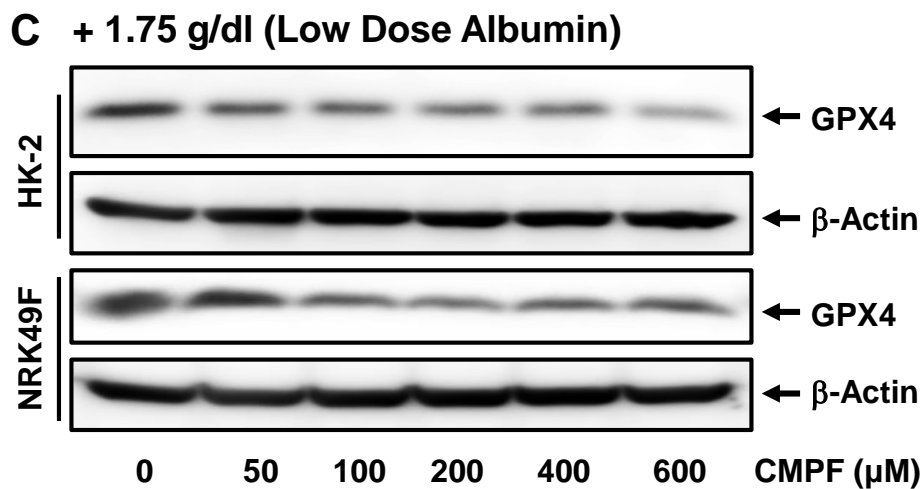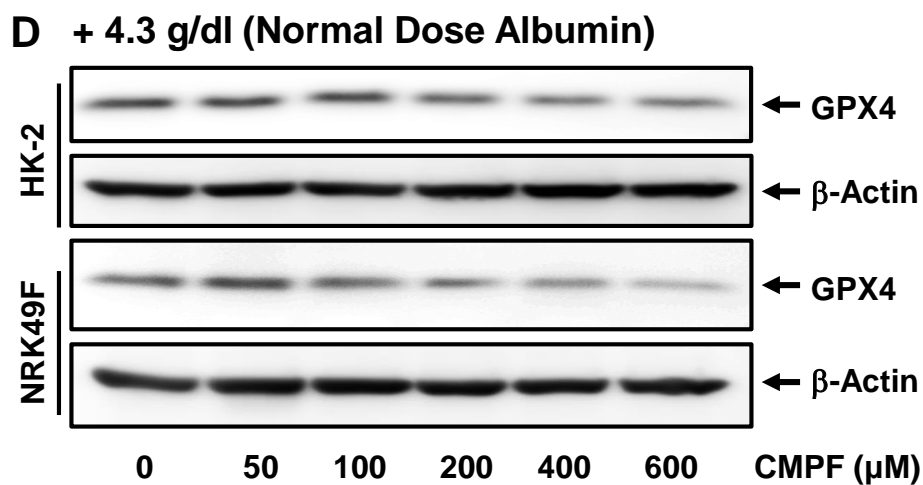

**Supplementary Fig 1. GPX4 protein expression by CMPF treatment.** (A) GPX4 protein expression in HK-2 cells treated with 400  $\mu$ M CMPF for 24 h was reduced in all culture conditions. (B) In HK-2 and NRK49F cells, GPX4 protein expression was decreased in a dose-dependent manner in response to 0, 50, 100, 200, 400, and 600  $\mu$ M concentrations of CMPF under complete media (+10% FBS) conditions. (C) In human serum albumin (1.75 g/dL, low concentration), GPX4 protein expression was decreased in a CMPF concentration-dependent manner. (D) In the medium containing human serum albumin (4.3 g/dL, normal concentration), GPX4 protein expression was reduced in a CMPF concentration-dependent manner.
